# Supplementary material
Source: publisher figshare collection journal article supplement (https://brill.figshare.com/ndownloader/files/15433052)
Supplement: Supplementary file 1 [file 15433052]

# **Multisensory, Multi-Tasking Performance of Older Adults With and Without Subjective Cognitive Decline**

**Sophie Carr <sup>1,2</sup>, M. Kathleen Pichora-Fuller <sup>2,4</sup>, Karen Z. H. Li <sup>3,4</sup>, Natalie**

**Phillips <sup>3,4</sup> and Jennifer L. Campos <sup>1,2,4,\*</sup>**

<sup>1</sup> Toronto Rehabilitation Institute, University Health Network, Canada

<sup>2</sup> Department of Psychology, University of Toronto, Canada

<sup>3</sup> Department of Psychology, Concordia University, Canada

<sup>4</sup> Centre for Research in Human Development, Concordia University, Canada

Received 29 January 2019; accepted 28 May 2019

\* To whom correspondence should be addressed. E-mail: Jennifer.Campos@uhn.ca

**Supplementary Material**

### **Supplementary Table S1.**

Each column represents one participant in each group (OA group and SCD group). Each row represents a question that each participant was asked regarding their perceptions of their own cognitive abilities, actions they have taken regarding their concern (e.g., speaking to family/friends), and each individual's MoCA scores. Cells marked 'x' indicate where the participant expressed that they had concerns. Cells marked '<' (less than) and '>' (more than) relate to the amount of time they have felt concerned. The rows marked 'Screening' are how they responded when first screened for eligibility in the study and the rows marked 'SCD Questionnaire' are their responses on the full questionnaire completed during the Assessment Session.
